# Supplementary material
Source: PubMed Central journal article supplement (PMC2719572)
Supplement: E09-02-0114_1.pdf [file E09-02-0114_1.pdf]

Supplemental Table 1

**Latrunculin A inhibits the transcription of HoxB genes. Level of the respective mRNAs at different times after addition of RA at t=0.**

|              | t=0 | t=16h p RA          | t=16h p RA<br>LAT at t=0   | t=48h p RA       | t=48h p RA<br>LAT at t=24h      | t=72h p RA        | t=72h p RA<br>LAT at t=48h       |
|--------------|-----|---------------------|----------------------------|------------------|---------------------------------|-------------------|----------------------------------|
| <b>HoxB1</b> | 0   | 1.0<br>0.82-1.22    | <b>0.83</b><br>0.85-0.81   | 1.0<br>1.07-0.94 | <b>0.65</b><br><b>0.73-0.58</b> | 1.0<br>1.22-0.82  | 1.07<br>1.25-0.92                |
| <b>HoxB2</b> | 0   | 1.0<br>0.951-1.0521 | <b>0.86</b><br>1.097-0.637 | 1.0              | <b>0.65</b><br>0-79-0.53        | 1.0<br>0.876-1.14 | ND                               |
| <b>HoxB3</b> | 0   | 0                   | 0                          | 1.12-0.89        | <b>0.25</b><br><b>0.35-0.18</b> | 1.0<br>1.2-0.83   | 0.80<br>0.93-0.69                |
| <b>HoxB6</b> | 0   | 0                   | 0                          | 0                | 0                               | 1.0<br>1.13-0.89  | <b>0.55</b><br><b>0.383-0.79</b> |

In all cases, RA was added at t=0. LatA was added 24 h before the time of RNA measurement, except at the 16h time-point when LatA had been added with RA at t=0.

The numbers highlighted in **bold** show the inhibition of transcription by LatA.

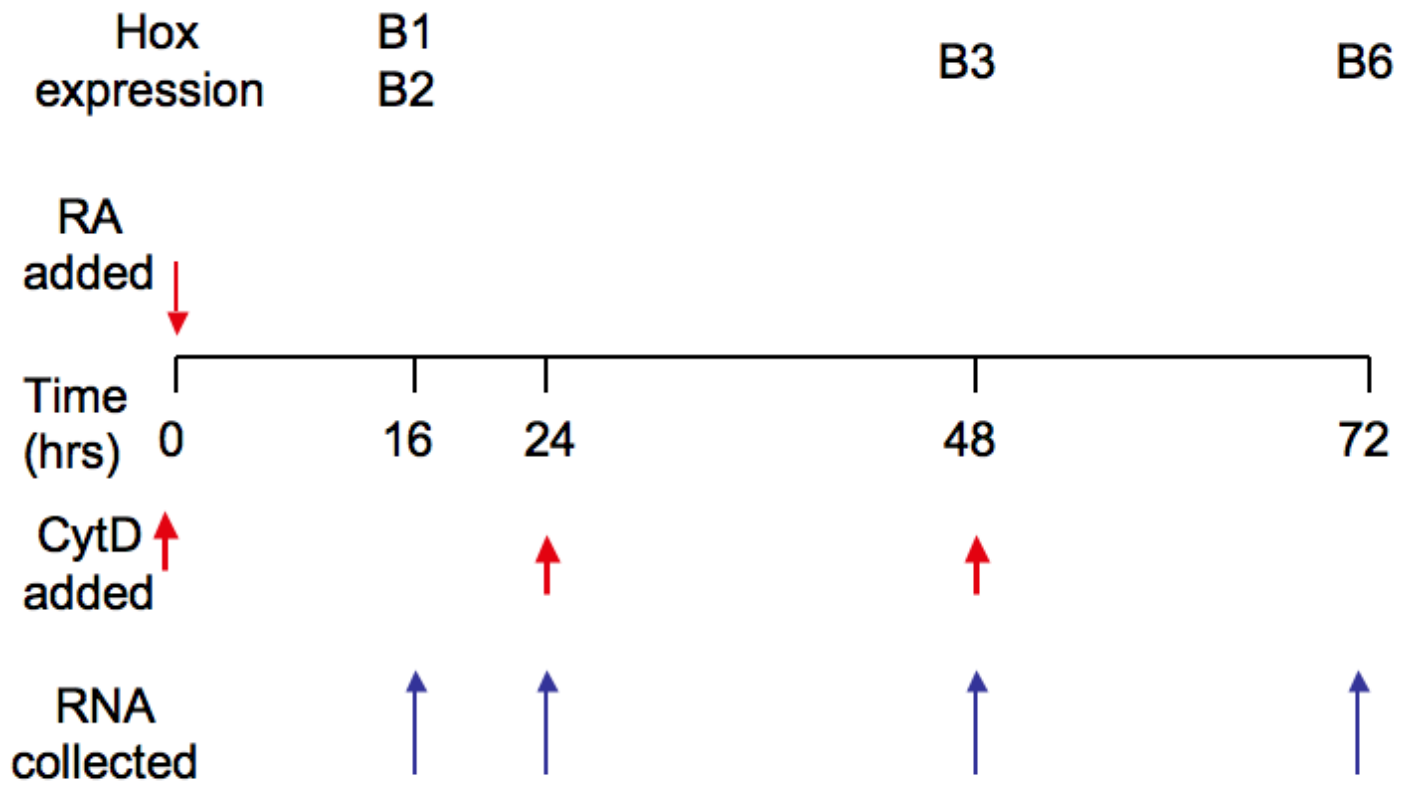

**Suppl. Figure 1.** Cells were treated with retinoic acid at time 0 (red arrow). Cyt D (red arrow) was added either at 0, or at 24 or at 48 hrs. RNA was extracted at 16, 24, 48 or 72 hrs (blue arrows).

**Supplementary Figure 2:**  
Original tracing of the Q-PCR measurement of HoxB1 and HoxB2 mRNA.

**16h RA**  
**16h CytD**

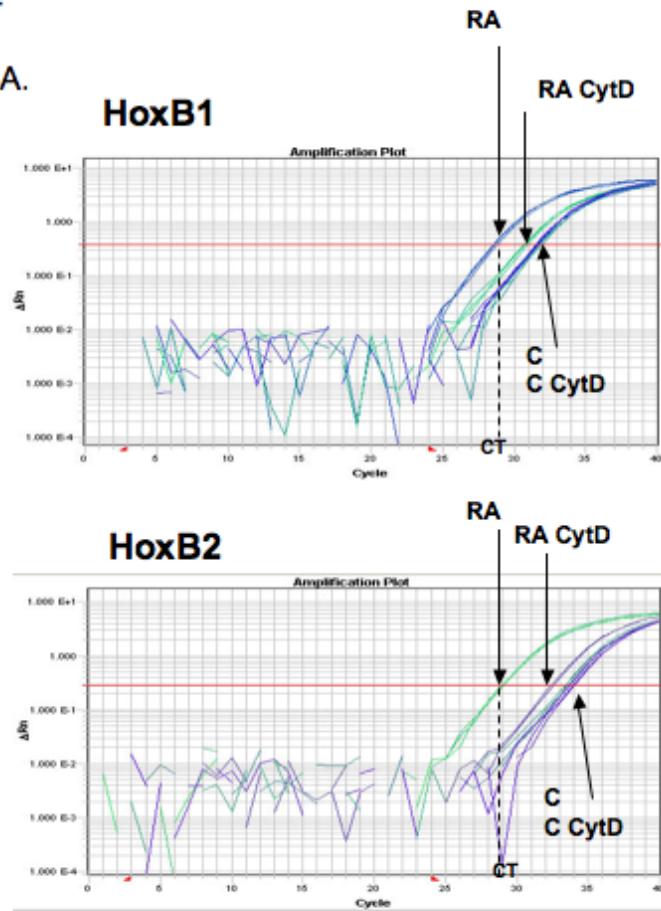

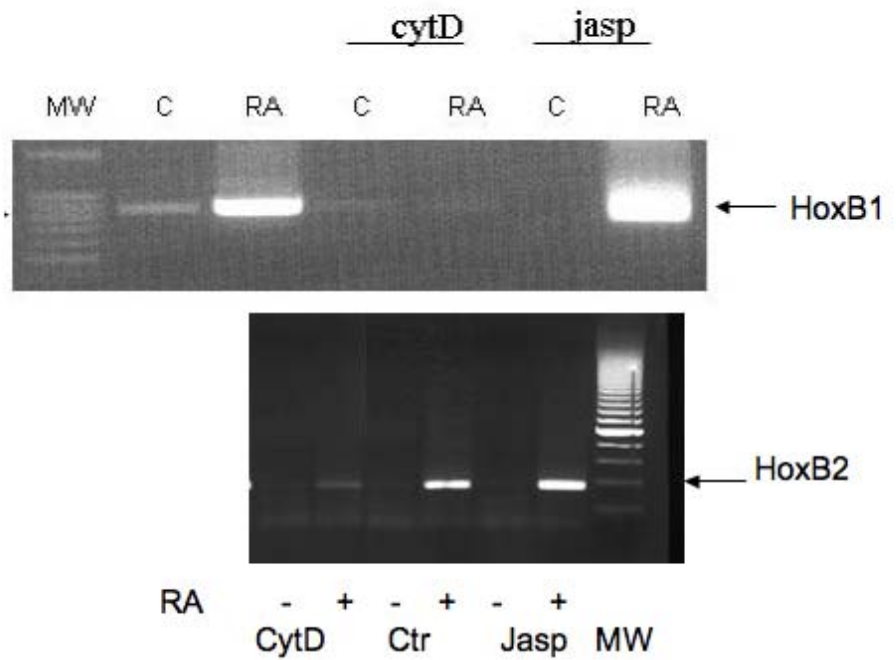

**Supplemental Figure 3**

Drugs that inhibit (100nM CytD) or stabilize (70 nM Jaspaklinolide) actin polymerization, inhibit or potentiate the induction of HoxB1 and HoxB2 transcription by 1  $\mu$ M Retinoic acid (RA). Ctr= untreated.
